# Supplementary material
Source: publisher site journal article supplement (https://www.dovepress.com/article/364115)
Supplement: Supplementary file 1 [file get_supplementary_file.php]

**Table S1 *Salmonella enterica* isolates obtained from July 2019 to April 2021 used in this study**

| **Serovars** | **Sources (no.)** | | | | | | **Total** |
| --- | --- | --- | --- | --- | --- | --- | --- |
|  | **chicken** | **pig** | **cattle** | **chicken meat** | **pork** | **beef** |  |
| Agona | 14 |  |  | 3 |  |  | 17 |
| Albany |  |  |  | 2 |  |  | 2 |
| Altona |  |  |  | 1 |  |  | 1 |
| Anatum | 1 |  |  | 1 | 4 |  | 6 |
| Bovismorbificans |  |  |  |  | 1 |  | 1 |
| Braenderup |  |  |  | 9 | 1 |  | 10 |
| Cerro |  |  |  | 2 |  |  | 2 |
| Corvallis | 33 |  |  | 3 |  |  | 36 |
| Derby |  | 12 | 7 |  | 30 | 1 | 50 |
| Enteritidis |  |  |  | 22 |  |  | 22 |
| Give |  |  |  | 1 | 1 |  | 2 |
| Goldcoast |  |  |  |  | 8 |  | 8 |
| Indiana | 10 |  |  | 26 |  |  | 36 |
| Infantis | 1 |  |  | 1 | 1 |  | 3 |
| Kedougou |  |  |  | 1 |  |  | 1 |
| Kentucky | 4 | 1 |  | 38 | 1 |  | 44 |
| Kottbus |  |  |  | 2 |  |  | 2 |
| Litchfield |  |  |  |  | 6 |  | 6 |
| Livingstone |  |  |  |  | 4 |  | 4 |
| London |  | 4 |  | 3 | 31 | 16 | 54 |
| Mbandaka | 4 |  | 1 |  | 1 |  | 6 |
| Meleagridis | 1 |  |  |  |  |  | 1 |
| Muenchen | 2 |  |  |  |  |  | 2 |
| Muenster | 3 |  |  |  |  |  | 3 |
| Newport |  |  |  |  | 10 |  | 10 |
| Paratyphi B | 1 |  |  |  |  |  | 1 |
| Putten |  |  |  | 2 |  |  | 2 |
| Rissen |  | 8 |  | 2 | 35 | 1 | 46 |
| Saintpaul |  |  |  | 2 | 7 |  | 9 |
| Senftenberg |  |  |  |  | 1 |  | 1 |
| Thompson |  |  |  | 4 |  |  | 4 |
| Typhimurium |  | 8 |  | 1 | 36 | 1 | 46 |
| Uganda |  |  |  |  | 7 |  | 7 |

**Table S2 Results of antimicrobial susceptibility test**

| **Antimicrobial agents** | **MIC (mg/L)** | **Interpretation** |
| --- | --- | --- |
| Ampicillin | >128 | R |
| Cefazolin | >128 | R |
| Cefotaxime | >128 | R |
| Meropenem | 32 | R |
| Gentamicin | 32 | R |
| Amikacin | 1 | S |
| Streptomycin | >256 | R |
| Tetracycline | 64 | R |
| Tigecycline | 2 | R |
| Chloramphenicol | >128 | R |
| Florfenicol | >128 | R |
| Nalidixic acid | >256 | R |
| Ciprofloxacin | 16 | R |
| Colistin | 0.25 | S |
| Fosfomycin | >512 | R |
| Sulfamethoxazole/trimethoprim | 64 | R |

The results are interpreted according to EUCAST (https://www.eucast.org).
